# Supplementary material for: Hydrogen peroxide-independent production of α-alkenes by OleTJE P450 fatty acid decarboxylase
Source: PubMed Central journal article supplement (PMC3937522; doi:10.1186/1754-6834-7-28), 2014-02-24
Supplement: 1754-6834-7-28-S7.pdf [file 1754-6834-7-28-S7.pdf]

**Table S1. Primers used in this study**

| <b>Primer name</b> | <b>Primer sequence (5'→3')</b>                                      | <b>Function of<br/>underlined bases</b> |
|--------------------|---------------------------------------------------------------------|-----------------------------------------|
| OleT-NdeI          | GTATTTCC <u>CATATG</u> GCAACACTTAAGAGGGATAAG                        | <i>Nde</i> I site                       |
| OleT-HindIII       | CAATGA <u>AAGCTT</u> TTATGTTCTGTCTACAACTTCGC                        | <i>Hind</i> III site                    |
| OleT-F             | GCGCC <u>CATATG</u> ATGGCAACACTTAAGAGGGA                            | <i>Nde</i> I site                       |
| OleT-RhFRED-OE     | <u>TGACCGGTTGATGCCGGTGCAGCACGAATTCTGTTC</u><br>TGTCTACAACTTCGCGAACA | overlap sequence<br>for gene fusion     |
| RhFRED-F           | <u>GAATTC</u> GTGCTGCACCGGCATCAACCGGTCA                             | <i>Eco</i> RI site                      |
| RhFRED-R           | TCCCA <u>AAGCTT</u> TCAGAGTCGCAGGGCCAGCC                            | <i>Hind</i> III site                    |
| FdR-BamHI-F        | CGCG <u>GGATCC</u> GATGGCTGATTGGGTAACA                              | <i>Bam</i> HI site                      |
| FdR-SalI-R         | CAAC <u>GTCGACT</u> TACCAGTAATGCTCCGC                               | <i>Sal</i> I site                       |
| Fld- BamHI-F       | CGCG <u>GGATCC</u> T-ATGGCTATCACTGGCATC                             | <i>Bam</i> HI site                      |
| Fld-SalI-R         | CGCG <u>GTCGACT</u> CAGGCATTGAGAATTTC                               | <i>Sal</i> I site                       |
